# Supplementary material
Source: PubMed Central journal article supplement (PMC7557246)
Supplement: ao0c02971_si_001.pdf [file ao0c02971_si_001.pdf]

**Supporting Information for:**

**Microfluidic encapsulation of hydrophobic antifouling biocides in calcium-alginate hydrogels for controllable release**

Yingzhe Liu<sup>†</sup> and Takasi Nisisako<sup>\*‡</sup>

<sup>†</sup> Department of Mechanical Engineering, School of Engineering, Tokyo Institute of Technology, Tokyo, 152-8552 Japan

<sup>‡</sup> Institute of Innovative Research, Tokyo Institute of Technology, R2-9, Nagatsuta-cho, Midori-ku, Yokohama, Kanagawa, 226-8503 Japan

\*To whom correspondence should be addressed: nisisako.t.aa@m.titech.ac.jp

Supporting information includes:

**Figure S-1.** Introduction of antifouling biocides into paint formulation.

**Figure S-2.** Antifouling mechanism of Irgarol on aquatic plant species.

**Figure S-3.** Scanning electron microscopy (SEM) images of the cross-section of the Ca-alginate hydrogel particles.

**Figure S-4.** ATR-FTIR spectra of sodium alginate (Na-alginate) powder, synthesized Ca-alginate particles, Ca-alginate particles containing Irgarol, and Irgarol powder.

**Figure S-5.** High speed photomicrographs showing the break-off of a Na-alginate droplet containing both the drug and cellulose fibers.

**Figure S-6.** A photograph from the side showing the particles deformation measurement.

**Figure S-7.** A SEM image of the cellulose fibers.

**Figure S-8.** Schematic illustration of the UV-Vis measurement process.

**Figure S-9.** Measurement of UV-Vis absorbance spectra of Irgarol (Sample 1) at different dilution ratios.

**Figure S-10.** Relationship between the UV-Vis absorbance and the drug concentration.

**Table S-1.** Sizes and size distributions of microcapsules for biocides encapsulation in literature.

**Table S-2.** Contents of the disperse phase used in the experiment.

**Table S-3.** The details of the five samples.

**Table S-4.** Results of the linear fitting.

**Table S-5.** Details of the hydrogel samples for the UV-Vis measurement.

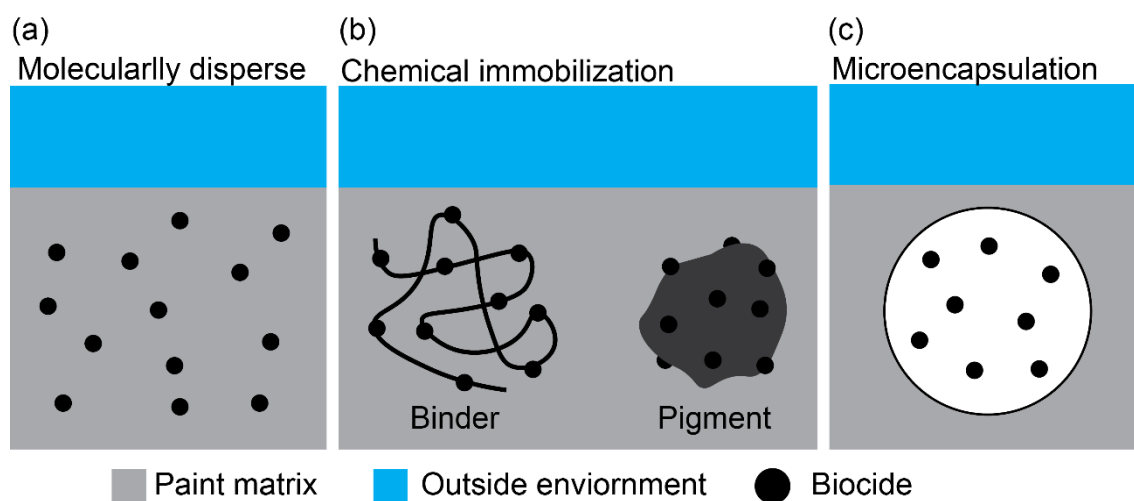

**Figure S-1.** Antifouling biocides can be introduced into paint formulation by (a) molecular dispersion, (b) immobilization to a large component, and (c) encapsulation.

# Photosynthesis process

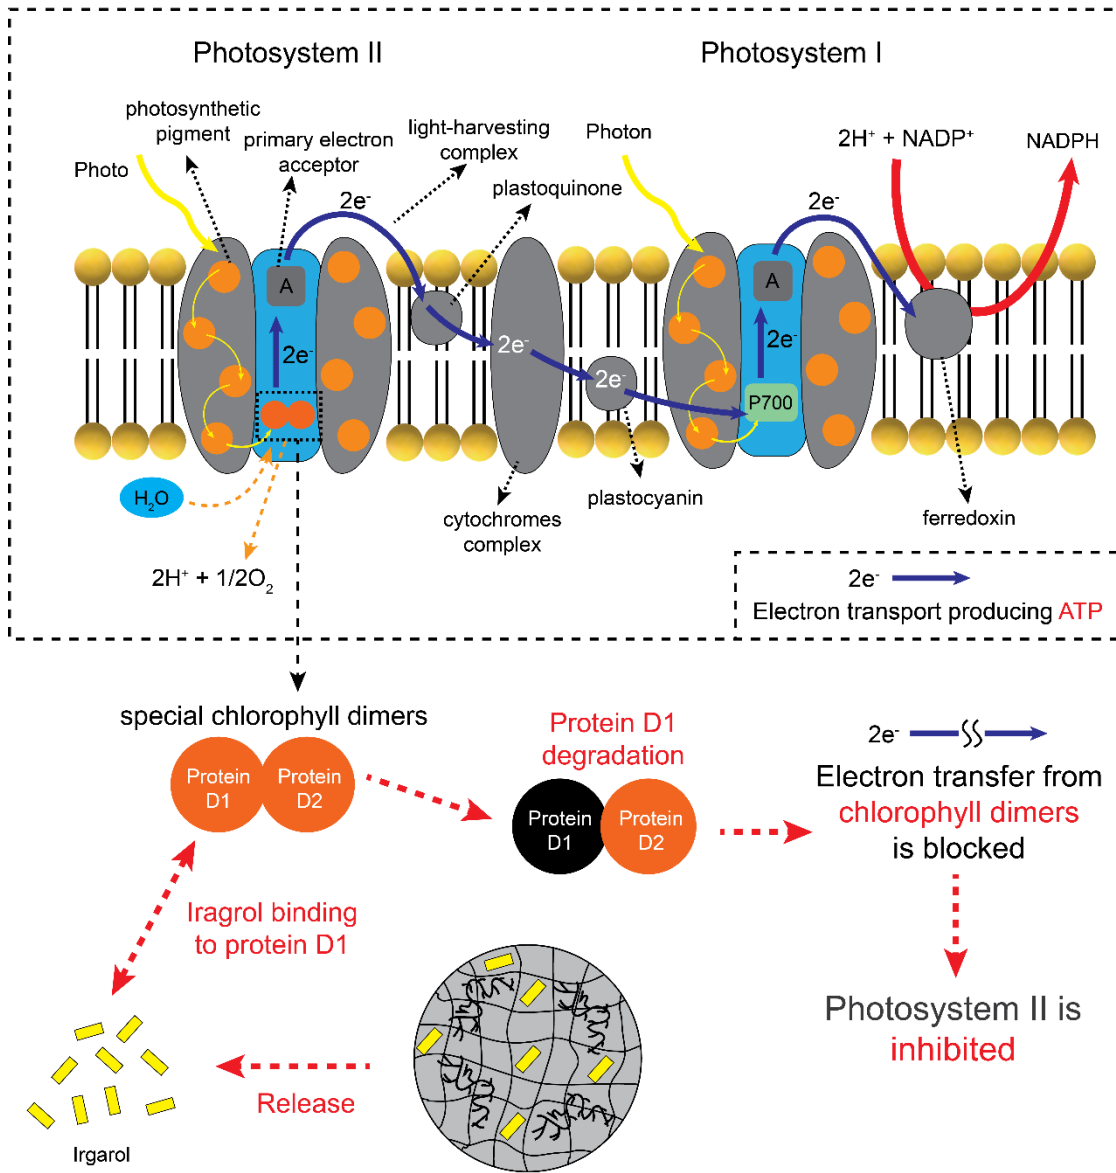

**Figure S-2.** Antifouling mechanism of Irgarol on aquatic plant species.

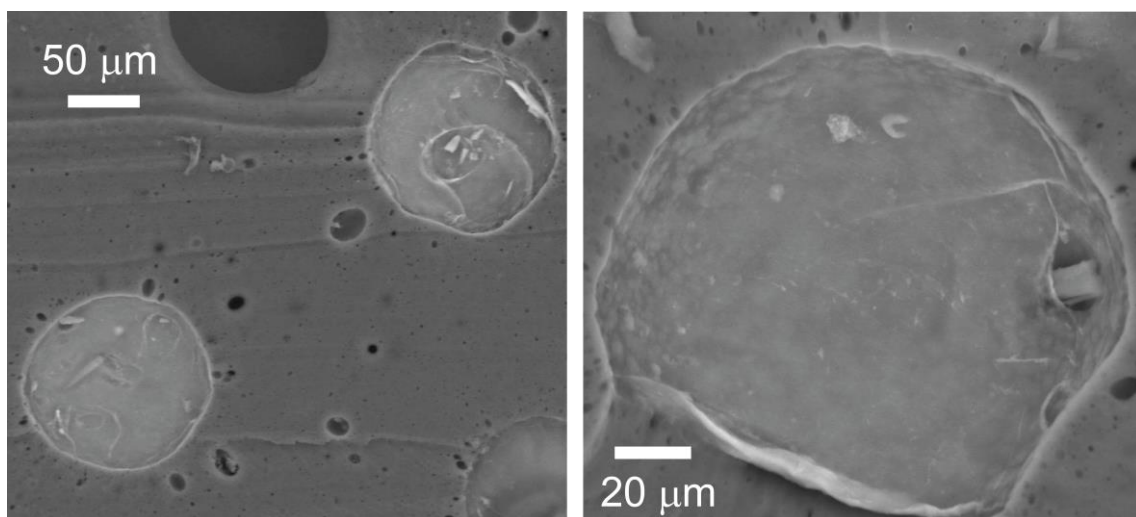

**Figure S-3.** Scanning electron microscopy (SEM) images of the cross-section of the Ca-alginate hydrogel particles.

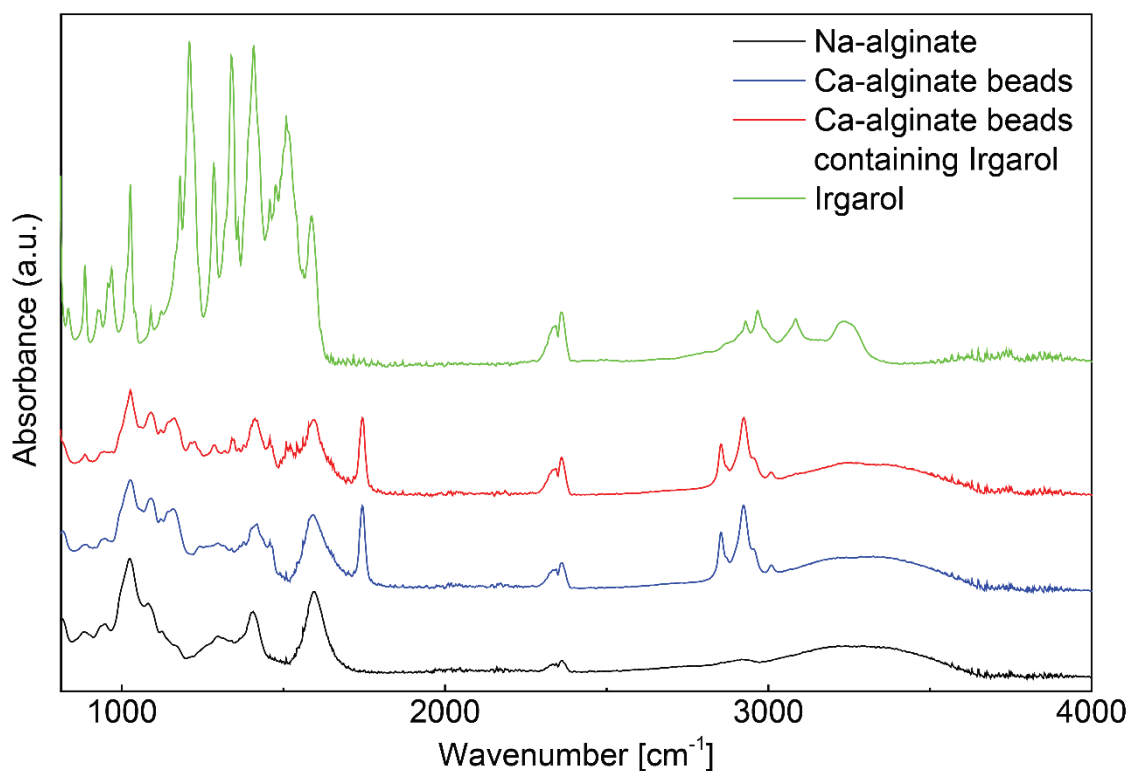

**Figure S-4.** ATR-FTIR spectra of sodium alginate (Na-alginate) powder, synthesized Ca-alginate particles, Ca-alginate particles containing Irgarol, and Irgarol powder. For the spectra of Ca-alginate particles, compared with the Na-alginate powder, the asymmetric stretching peak of  $\text{-COO}^-$  at  $1590\text{ cm}^{-1}$  is gradually replaced by a new absorption peak at  $1624\text{ cm}^{-1}$ , which is caused by the interaction of  $\text{Ca}^{2+}$  with the  $\text{-COO}^-$  groups of Na-alginate <sup>1</sup>. Further, the spectrum of the Ca-alginate beads with Irgarol shows more absorption peaks than the Ca-alginate beads without Irgarol in the wavenumber ranging from  $1552\text{ cm}^{-1}$  to  $1198\text{ cm}^{-1}$ , suggesting the presence of Irgarol. The absorption peaks at  $2925\text{ cm}^{-1}$  and  $2854\text{ cm}^{-1}$  of the hydrogel samples were caused by the residual corn oil <sup>2</sup>.

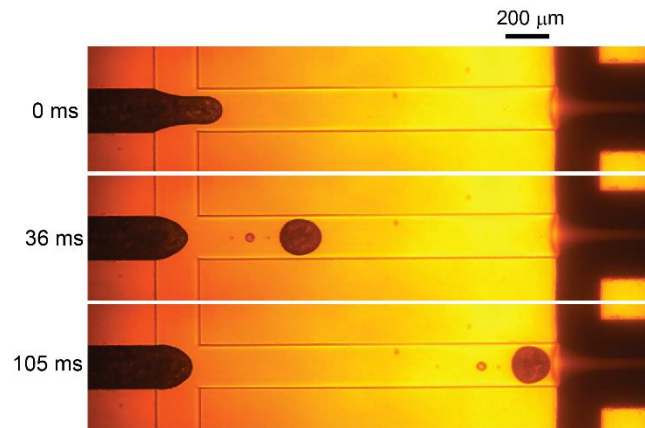

**Figure S-5.** High speed photomicrographs showing the break-off of a Na-alginate droplet containing both the drug and cellulose fibers. Flow rates of the droplet phase, carrier oil phase, and reactant emulsion stream are 0.1 mL/h, 2.0 mL/h ( $= 1.0 \text{ mL/h} \times 2$ ) and 20.0 mL/h ( $= 10.0 \text{ mL/h} \times 2$ ), respectively.

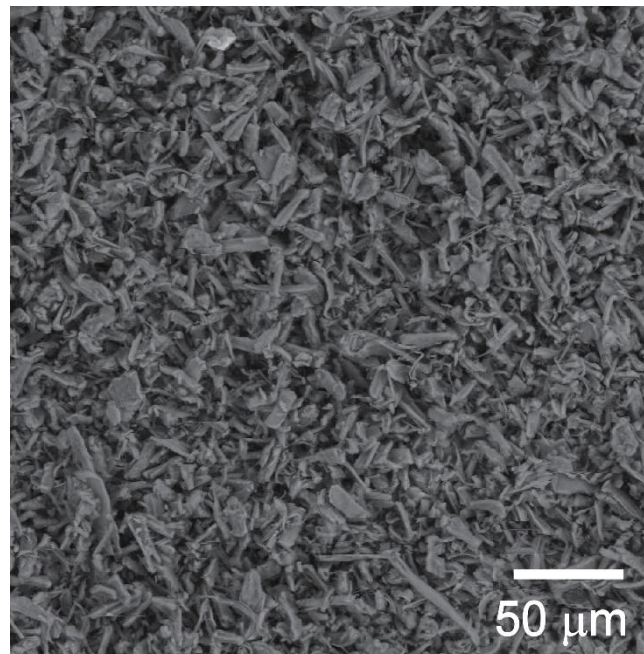

**Figure S-6.** An SEM image of the cellulose fibers.

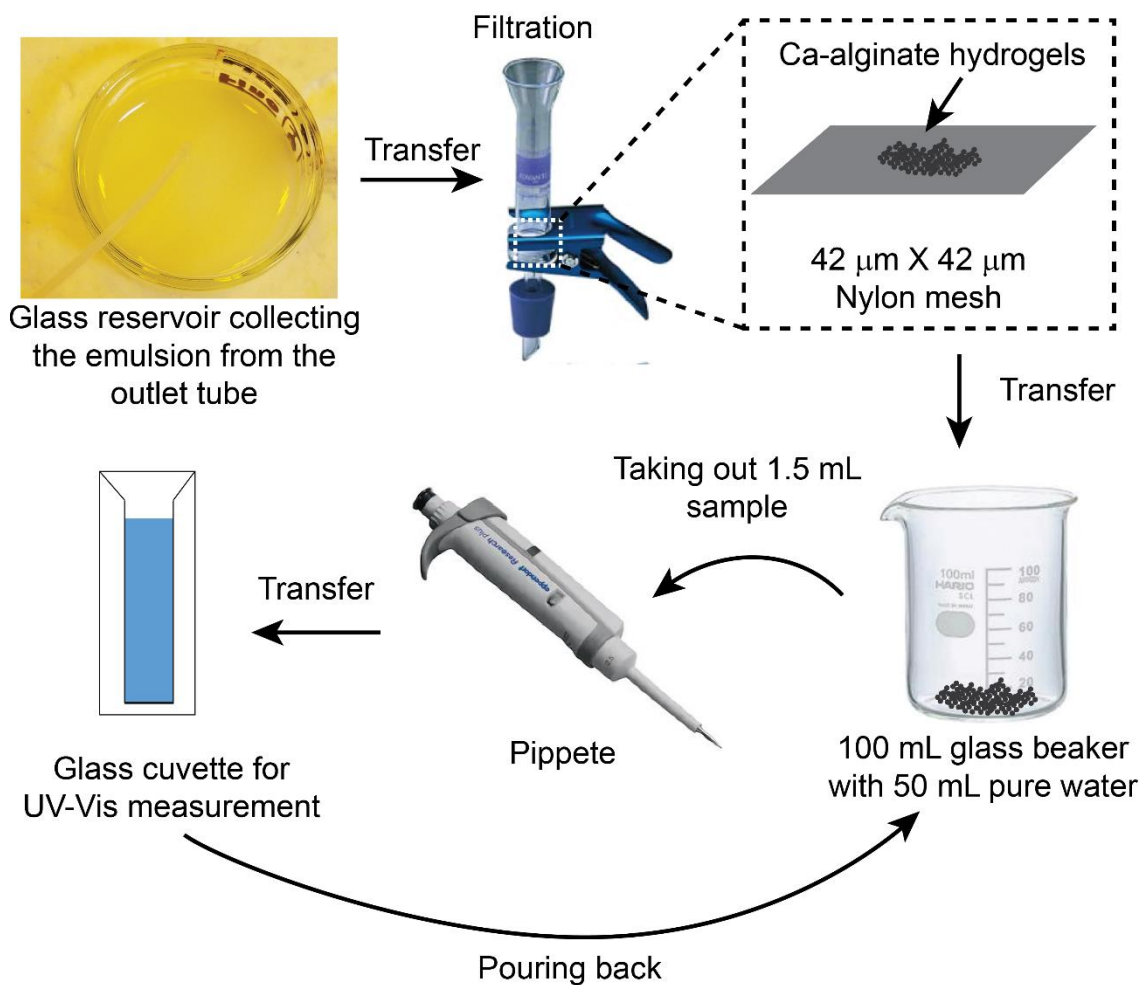

**Figure S-7.** Schematic illustration of the UV-Vis measurement process.

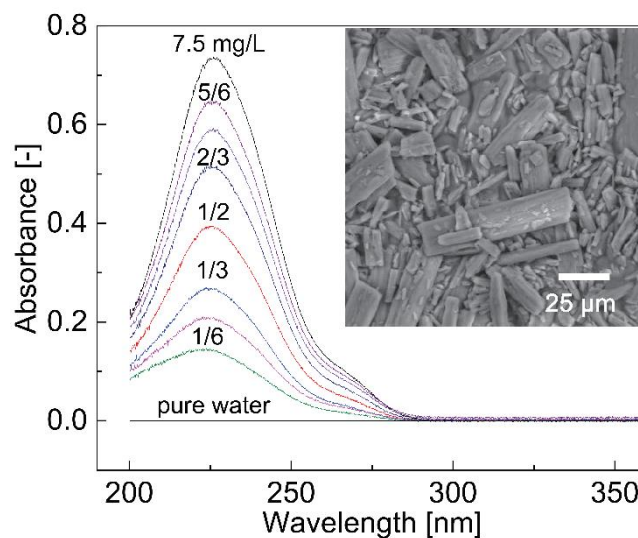

**Figure S-8.** Measurement of UV-Vis absorbance spectra of Irgarol (Sample 1) at different dilution ratios. The inset is an SEM image of Irgarol.

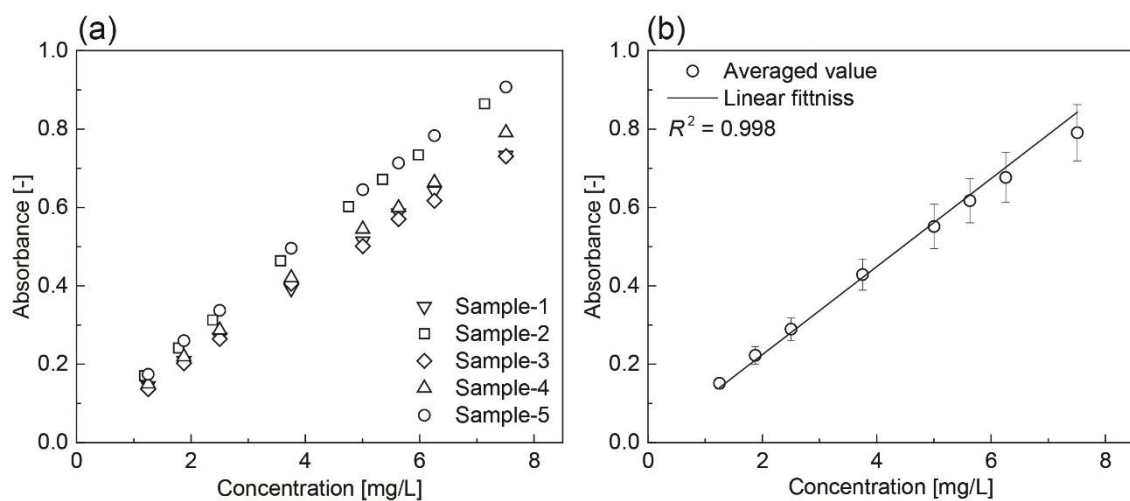

**Figure S-9.** Relationship between the UV-Vis absorbance and the drug concentration. (a) Relationship between the UV-Vis absorbance and the drug concentration of five samples. (b) The average data and linear fitting.

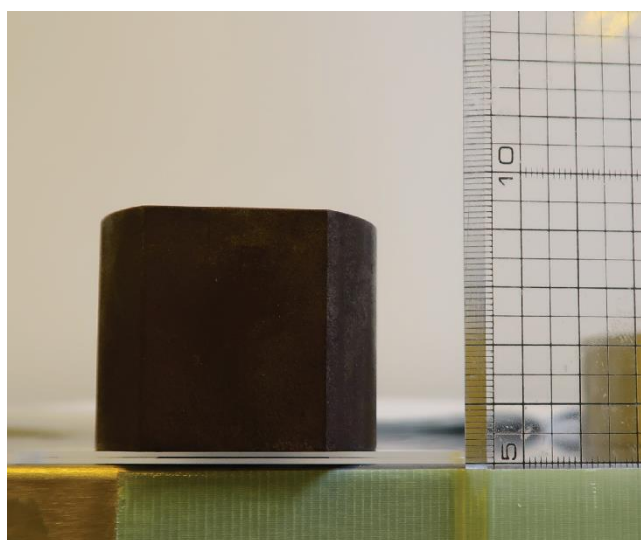

**Figure S-10.** A photograph from the side showing the particles deformation measurement.



**Table S-1.** Sizes and size distributions of microcapsules for biocides encapsulation in literature.

| Materials             | Biocides                    | Average diameter     | Coefficient variation | Reference |
|-----------------------|-----------------------------|----------------------|-----------------------|-----------|
| PLA (Poly(L-lactide)) | Chlorhexidine               | 1 $\mu\text{m}$      | N.A.                  | [19]      |
| PLGA and PLGA-PEG     | Perfluorooctyl bromide      | 12–26 $\mu\text{m}$  | N.A.                  | [20]      |
| Melamine formaldehyde | Aldehydes, alcohols, esters | 15 $\mu\text{m}$     | 13%                   | [21]      |
| PMMA                  | Medetomidine                | 12 $\mu\text{m}$     | 41.6%                 | [8]       |
| PMMA                  | Dodecane                    | 2.4 $\mu\text{m}$    | 19%                   | [22]      |
| PMMA                  | IPBC                        | N.A.                 | N.A.                  | [23]      |
| PMMA                  | Aurantiol                   | 20–200 $\mu\text{m}$ | N.A.                  | [24]      |

**Table S-2.** Contents of the disperse phase used in the experiment.

|             | 3 wt% Na-alginate solution | Irgarol <sup>®</sup> 1071 | Cellulose fiber | Mixing time (30000 rpm) |
|-------------|----------------------------|---------------------------|-----------------|-------------------------|
| Disperse #1 | 20.0 g                     | 0.1 g                     | -               | 3 min                   |
| Disperse #2 | 20.0 g                     | 0.05 g                    | -               | 3 min                   |
| Disperse #3 | 20.0 g                     | 0.1 g                     | 1.0 g           | 5 min                   |

**Table S-3.** The details of the five samples.

|          | Water (mL) | Drug weight (mg) | Concentration (mg/L) |
|----------|------------|------------------|----------------------|
| Sample 1 | 399.6      | 3.0              | 7.5                  |
| Sample 2 | 399.4      | 2.9              | 7.3                  |
| Sample 3 | 399.5      | 3.0              | 7.5                  |
| Sample 4 | 399.4      | 3.0              | 7.5                  |
| Sample 5 | 399.6      | 3.0              | 7.5                  |

**Table S-4.** Results of the linear fitting.

| Intercept |                | Slope   |                | Statistics    |
|-----------|----------------|---------|----------------|---------------|
| Value     | Standard Error | Value   | Standard Error | Adj. R-Square |
| 0.02245   | 0.00363        | 0.10524 | 0.00137        | 0.99841       |

**Table S-5.** Details of the hydrogel samples for the UV-Vis measurement.

|        | The type of used disperse phase | Collection time | Encapsulated amount ( $m_e$ ) |
|--------|---------------------------------|-----------------|-------------------------------|
| Type 1 | Disperse #1                     | 30 min          | 0.250 mg                      |
| Type 2 | Disperse #2                     | 30 min          | 0.125 mg                      |
| Type 3 | Disperse #1                     | 60 min          | 0.500 mg                      |
| Type 4 | Disperse #2                     | 60 min          | 0.250 mg                      |
| Type 5 | Disperse #3                     | 60 min          | 0.500 mg                      |

## References

- (1) Saarai, A.; Kasparikova, V.; Sedlacek, T.; Saha, P. On the development and characterisation of crosslinked sodium alginate/gelatine hydrogels. *J. Mech. Behav. Biomed.* **2013**, *18*, 152–166.
- (2) Setyaningrum, D. L.; Riyanto, S.; Rohman, A. Analysis of corn and soybean oils in red fruit oil using FTIR spectroscopy in combination with partial least square. *Int. Food Res. J.* **2013**, *20*, 1977–1981.
